# Supplementary material for: Association of atypical antipsychotic use with mortality risk in patients with behavioural and psychological symptoms of dementia
Source: Research Square preprint supplement (doi:10.21203/rs.3.rs-7795097/v1), 2025-12-15
Supplement: Supplementary file 1 [file d238b88ab61d5a590b448af4.docx]

| **eTable 1.** Definitions of the Study Medication, Diagnosis, and Non-pharmacologic Interventions for BPSD. | |
| --- | --- |
| **Diagnosis and Non-pharmacologic Interventions** | **Definition / Coding system** |
| Alzheimer’s disease | ICD-10: G30 |
| Vascular dementia | ICD-10: F01 |
| Dementia in other diseases classified elsewhere | ICD-10: F02 |
| Unspecified dementia | ICD-10: F03 |
| Alzheimer’s medications | |
| Donepezil | RxNorm: 135447 |
| Rivastigmine | RxNorm: 183379 |
| Galantamine | RxNorm: 4637 |
| Memantine | RxNorm: 6719 |
| Atypical antipsychotics | |
| Olanzapine | RxNorm: 61381 |
| Quetiapine | RxNorm: 51272 |
| Clozapine | RxNorm: 2626 |
| Risperidone | RxNorm: 35636 |
| Aripiprazole | RxNorm: 89013 |
| Ziprasidone | RxNorm: 115698 |
| Asenapine | RxNorm: 784649 |
| Paliperidone | RxNorm: 679314 |
| Iloperidone | RxNorm: 73178 |
| Lurasidone | RxNorm: 1040028 |
| Brexpiprazole | RxNorm: 1658314 |
| Non-pharmacologic interventions | |
| reality orientation | SNOMED: 228547007 |
| art therapy | SNOMED: 65153003 |
| music therapy | SNOMED: 21065008 |
| Activity therapy (≥45 min per session) | HCPCS: G0176 |
| aromatherapy | SNOMED: 394615007 |
| light therapy | SNOMED: 31394004 |
| Individual psychotherapy (Interpersonal) | ICD-10-PCS: GZ53ZZZ / GZ53 |
| Individual psychotherapy (Cognitive) | ICD-10-PCS: GZ52ZZZ / GZ52 |
| Counseling (Cognitive, Interpersonal, Psychoeducation, CBT) | ICD-10-PCS: HZ30, HZ34, HZ36, HZ32, HZ52 |
| Caregiver training (communication skills) | ICD-10-PCS: F0FZJZZ |
| Dementia management | SNOMED: 386257007 |
| Brain stimulation | SNOMED: 362997005 |
| Cognitive and behavioral therapy | SNOMED: 228557008 |
| Physical exercise therapy | SNOMED: 183301007; ICD-10-PCS: F07H6ZZ |
| Therapeutic massage | ICD-10-PCS: 8E0KX1Z |
| Acupuncture (initial 15 min) | CPT: 97810 |
| Acupuncture (additional 15 min) | CPT: 97811 |
| Acupuncture, unspecified | CPT: 1013552, 1013553 |

| **eTable 2.** Covariable Definitions in this Study. | |
| --- | --- |
| **Covariable**  **(ascertained in the 365 days prior to index event)** | **Definition / Coding system** |
| Age | TriNetX demographic variable: Age at Index |
| Sex | TriNetX demographic variable: Sex |
| Race (White, Black or African American, Asian, Other, Unknown) | TriNetX demographic variable: Race (LOINC codes: 2106-3, 2054-5, 2028-9, 2131-1, UNK) |
| Nicotine dependence | ICD-10: F17 |
| Alcohol abuse | ICD-10: F10.1 |
| Obesity, unspecified | ICD-10: E66.9 |
| Essential (primary) hypertension | ICD-10: I10 |
| Type 2 diabetes mellitus | ICD-10: E11 |
| Hyperlipidemia, unspecified | ICD-10: E78.5 |
| Ischemic heart disease | ICD-10: I20–I25 |
| Atrial fibrillation and flutter | ICD-10: I48 |
| Heart failure | ICD-10: I50 |
| Other peripheral vascular diseases | ICD-10: I73 |
| Angina pectoris | ICD-10: I20 |
| Cerebral infarction | ICD-10: I63 |
| Transient cerebral ischemic attacks and related syndromes | ICD-10: G45 |
| Chronic kidney disease (CKD) | ICD-10: N18 |
| Other chronic obstructive pulmonary disease (COPD) | ICD-10: J44 |
| Sleep apnea | ICD-10: G47.3 |
| Hepatic fibrosis | ICD-10: K74.0 |
| Malignant (primary) neoplasm, unspecified | ICD-10: C80.1 |

| 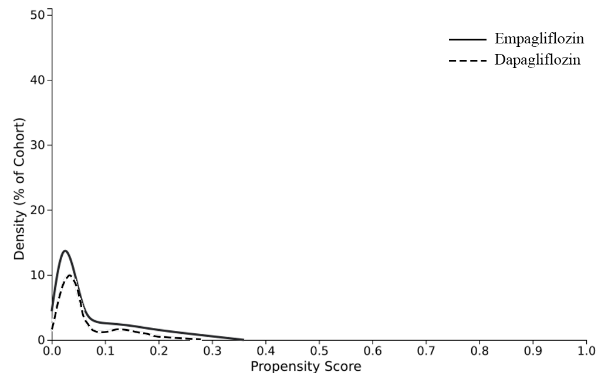 | 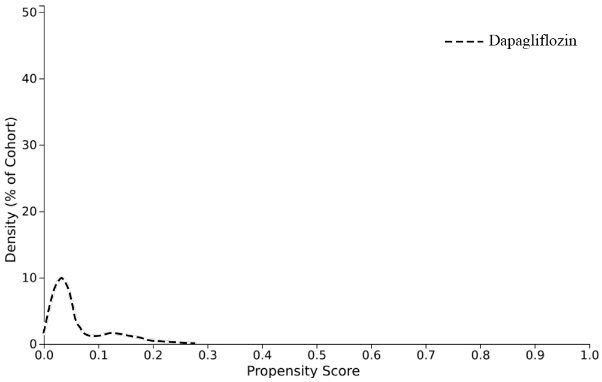 |
| --- | --- |
| 1. Before matching | 1. After matching |
| **eFig. 1 Propensity score density function - Before and after matching.** | |
